# Supplementary material for: A Comparative Investigation on Phenolic Composition, Characterization and Antioxidant Potentials of Five Different Australian Grown Pear Varieties
Source: PubMed Central journal article supplement (PMC7909527; doi:10.3390/antiox10020151), 2021-01-20
Supplement: antioxidants-10-00151-s001.pdf [file antioxidants-10-00151-s001.pdf]

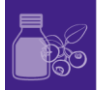

Supplementary data

# A Comparative Investigation on Phenolic Composition, Characterization and Antioxidant Potentials of Five Different Australian Grown PEAR Varieties

Zening Wang<sup>1</sup>, Colin J. Barrow<sup>2</sup>, Frank R. Dunshea<sup>1,3</sup> and Hafiz A.R. Suleria<sup>1,2\*</sup>

<sup>1</sup> School of Agriculture and Food, Faculty of Veterinary and Agricultural Sciences, The University of Melbourne, Parkville 3010, VIC, Australia; zeningw1@student.unimelb.edu.au (Z.W.); fdunshea@unimelb.edu.au (F.R.D)

<sup>2</sup> Centre for Chemistry and Biotechnology, School of Life and Environmental Sciences, Deakin University, Waurn Ponds, VIC 3217, Australia; colin.barrow@deakin.edu.au (C.J.B)

<sup>3</sup> Faculty of Biological Sciences, The University of Leeds, Leeds LS2 9JT, UK

\* Correspondence: Correspondence: hafiz.suleria@unimelb.edu.au; Tel.: +61-470-439-670

(a)

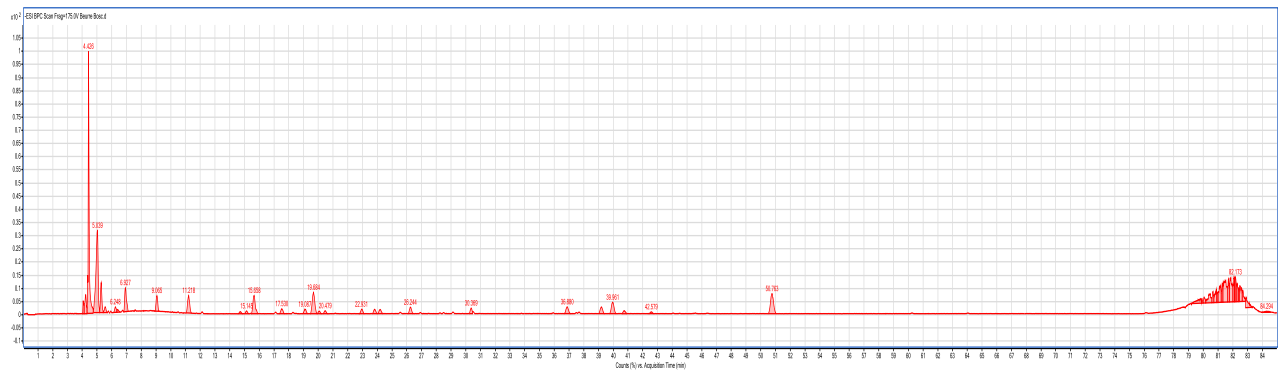

(b)

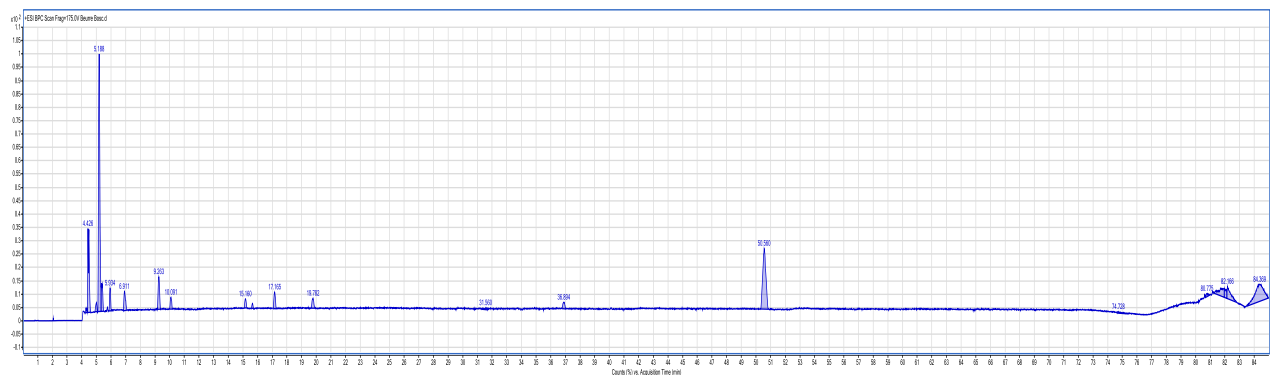

(c)

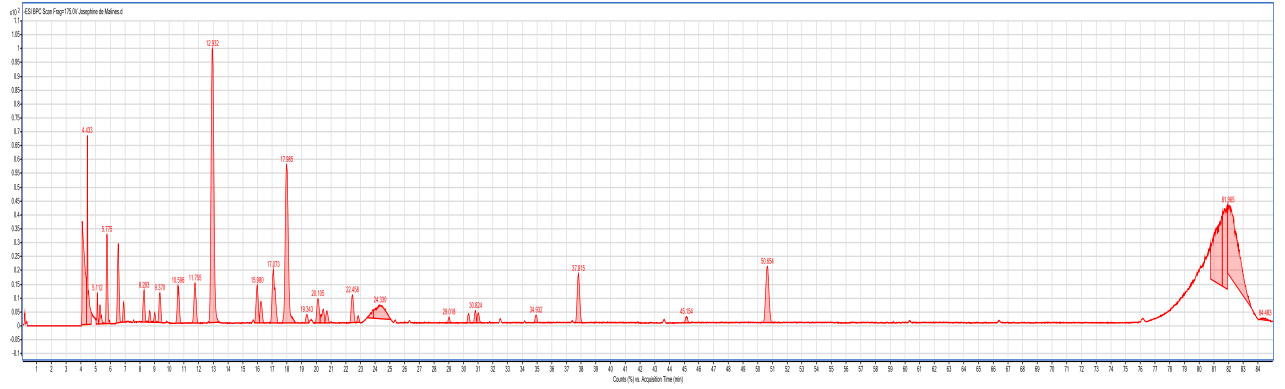

(d)

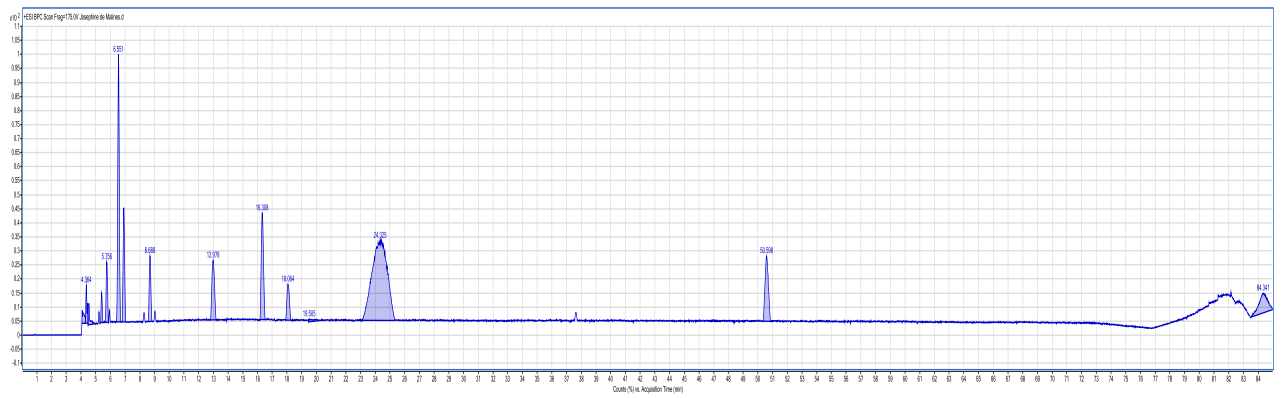

(e)

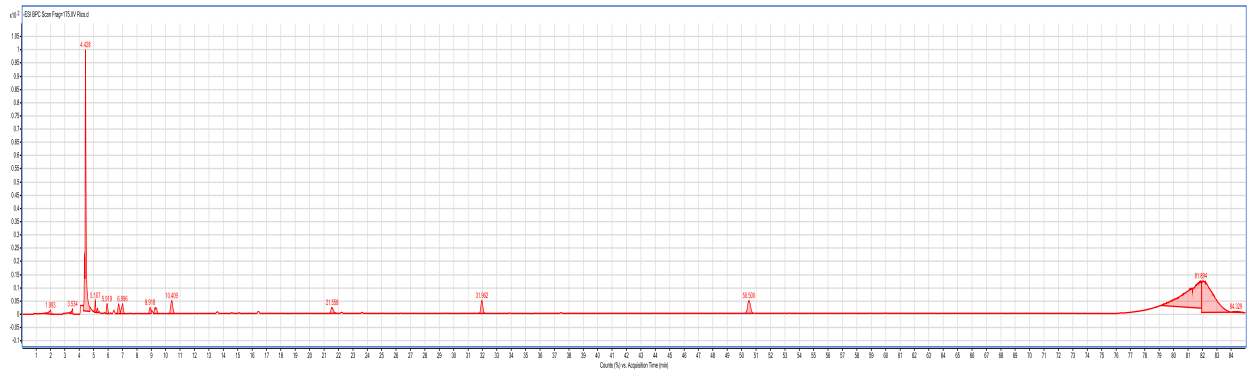

(f)

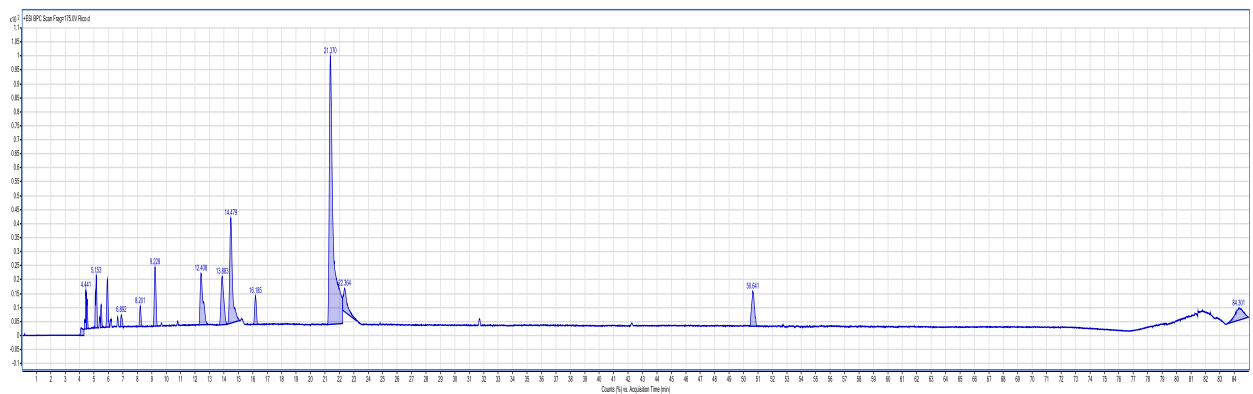

(g)

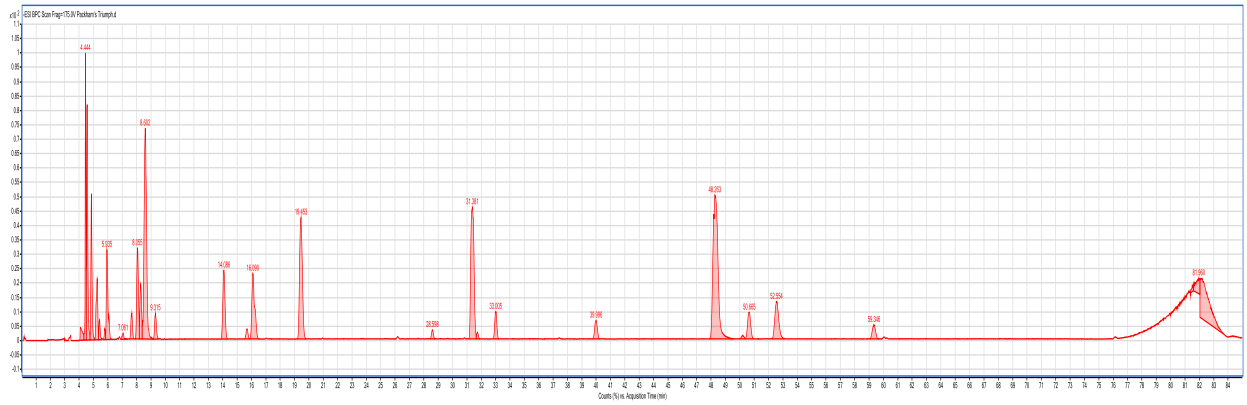

(h)

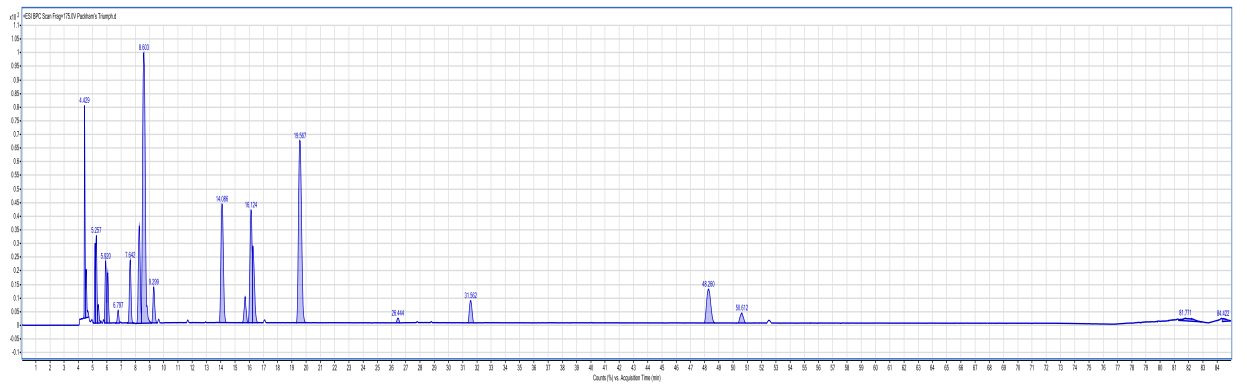

(i)

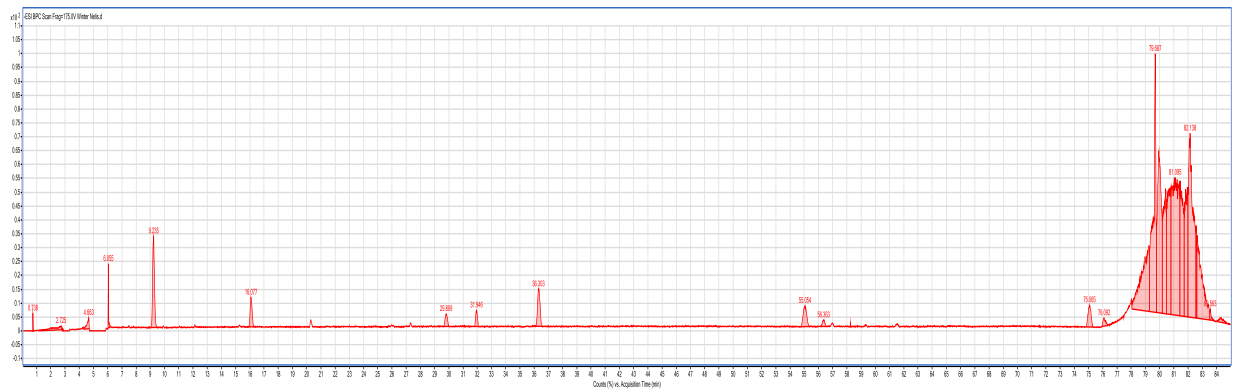

(j)

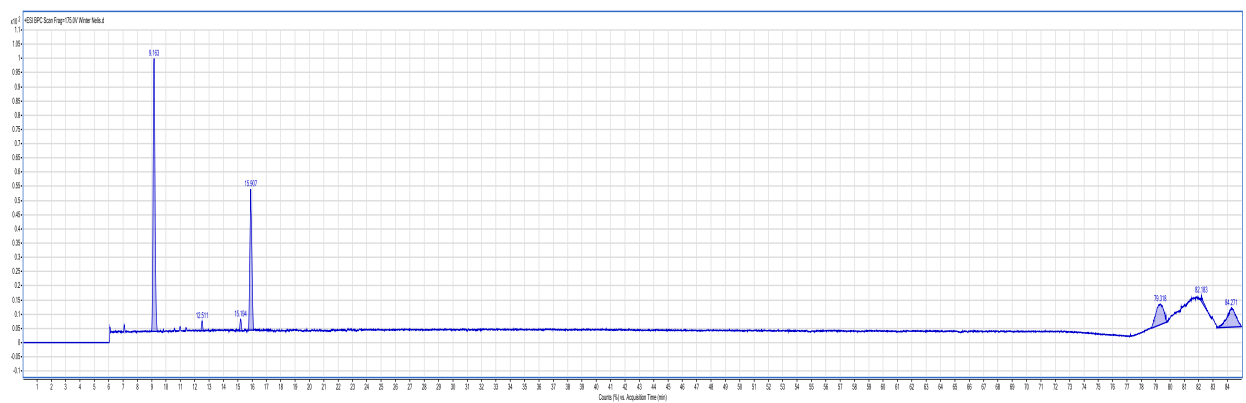

**Figure S1. S):** LC-ESI-QTOF-MS/MS basic peak chromatograph (BPC) for characterization of phenolic compounds of Australian grown pear varieties; **(a)** Beurre Bosc in negative ionization mode; **(b)** Beurre Bosc in positive ionization mode; **(c)** Josephine de Malines in negative ionization mode; **(d)** Josephine de Malines in positive ionization mode; **(e)** Rico in negative ionization mode; **(f)** Rico in positive ionization mode; **(g)** Packham's Triumph in negative ionization mode; **(h)** Packham's Triumph in positive ionization mode; **(i)** Winter Nelis in negative ionization mode; **(j)** Winter Nelis in positive ionization mode.

(a)

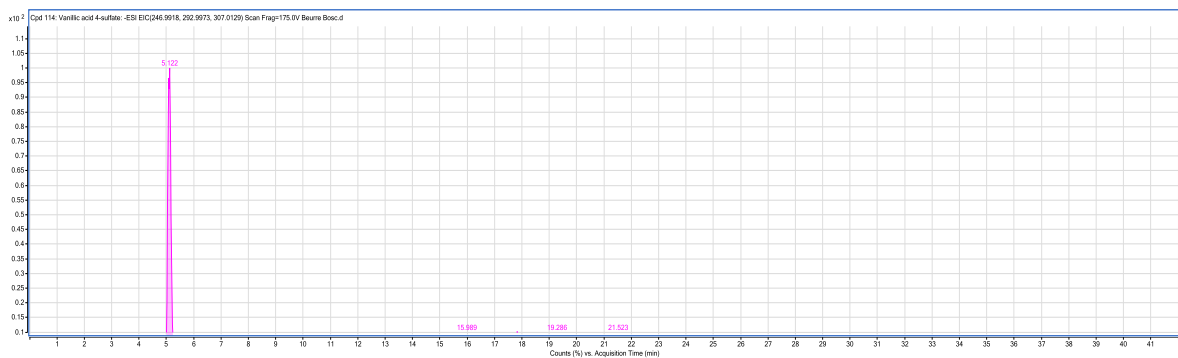

(b)

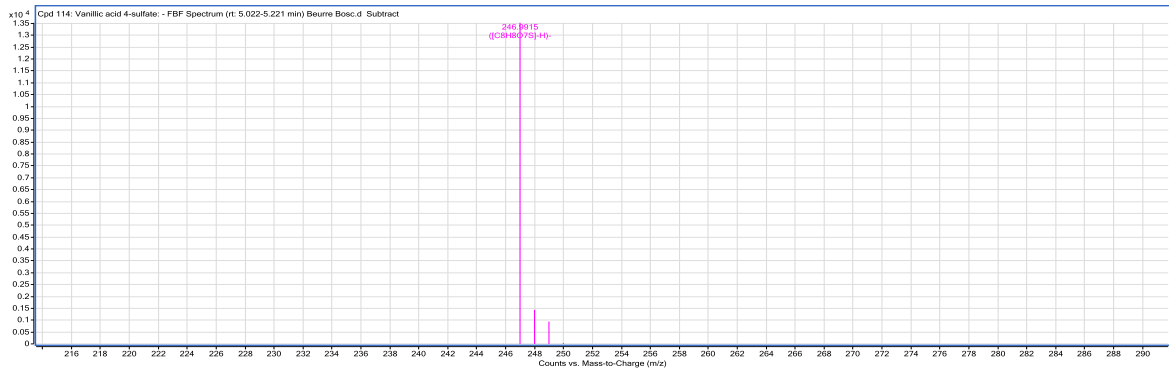

(c)

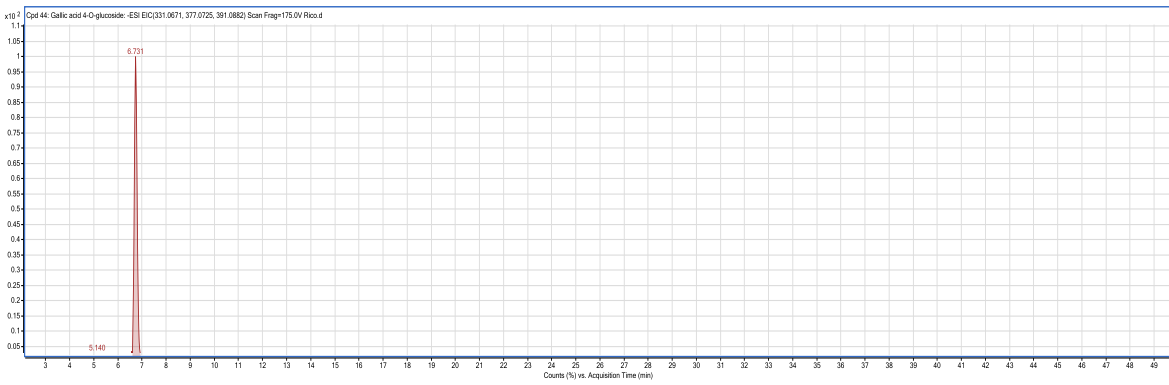

(d)

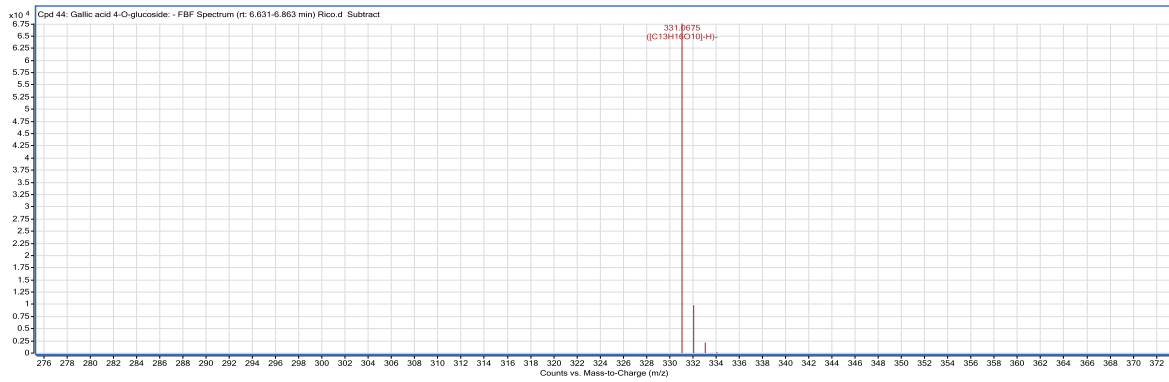

(e)

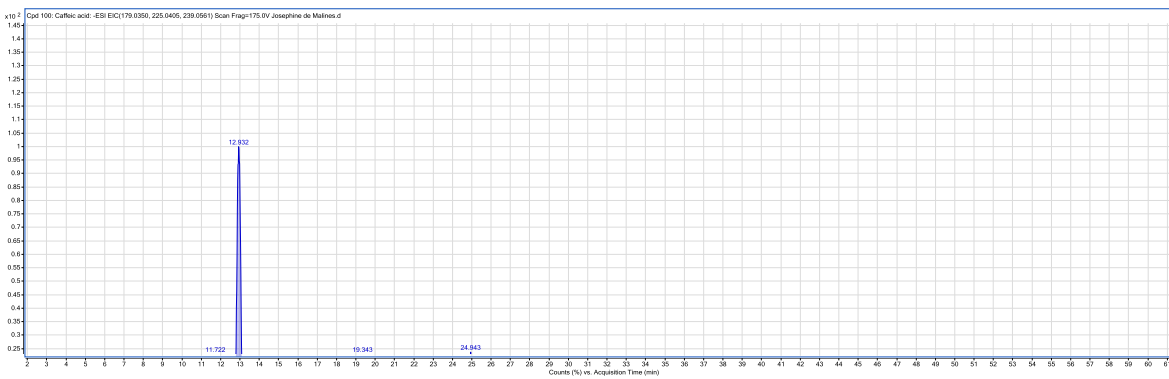

(f)

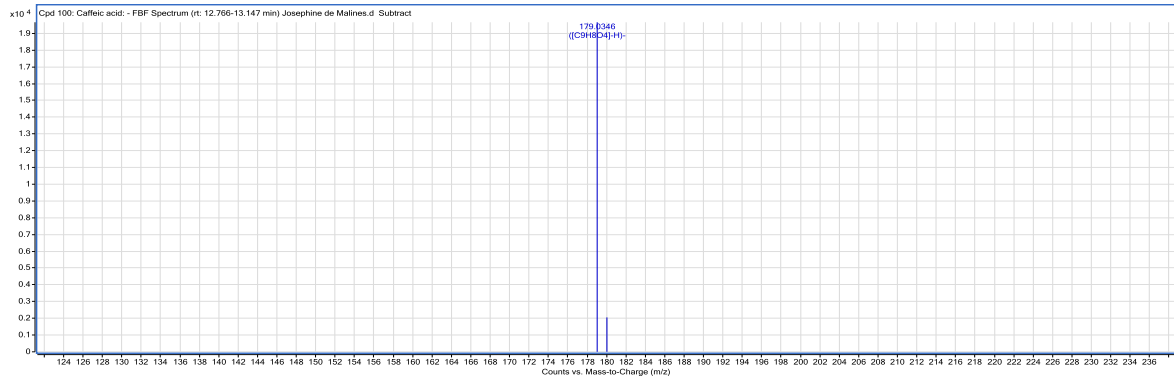

(g)

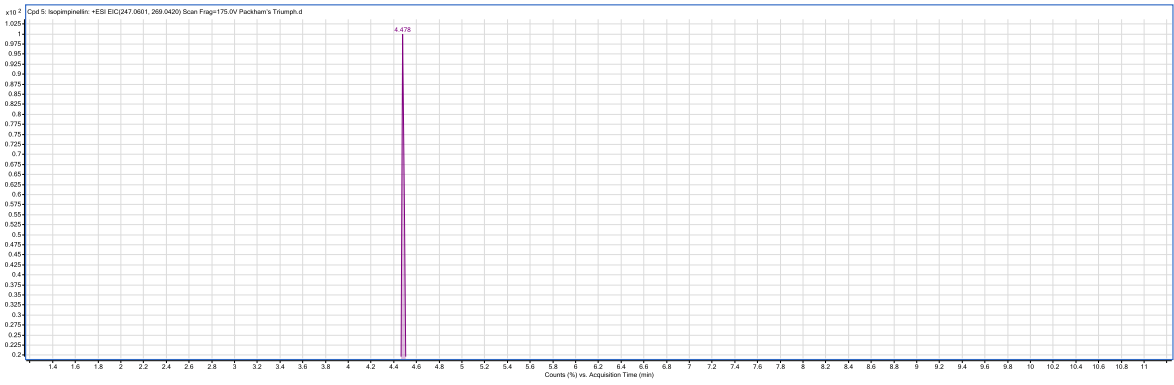

(h)

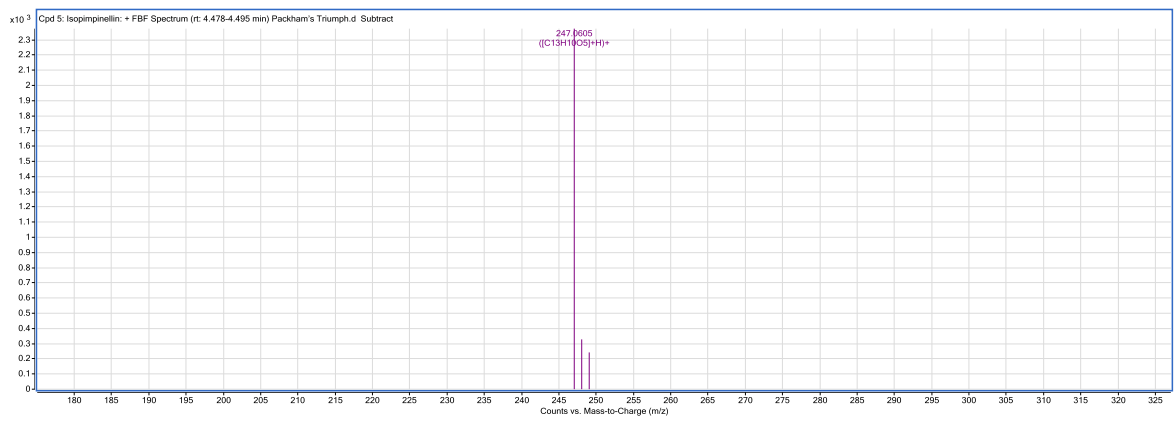

(i)

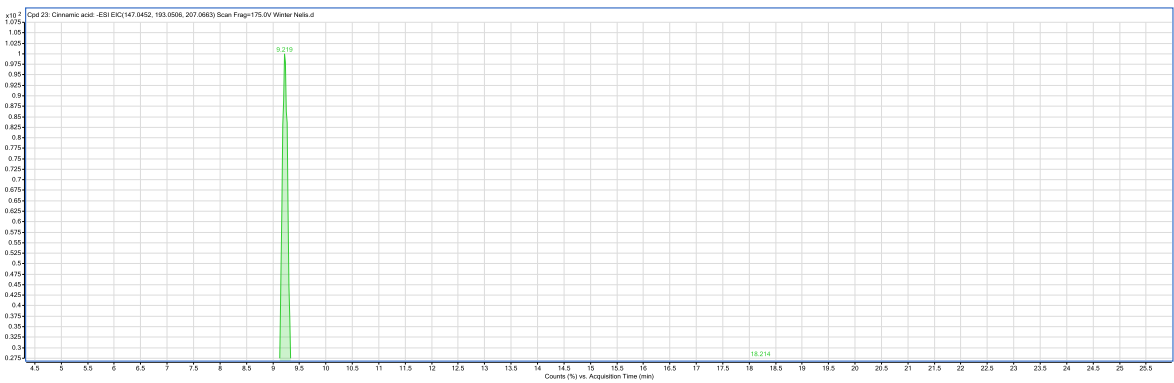

(j)

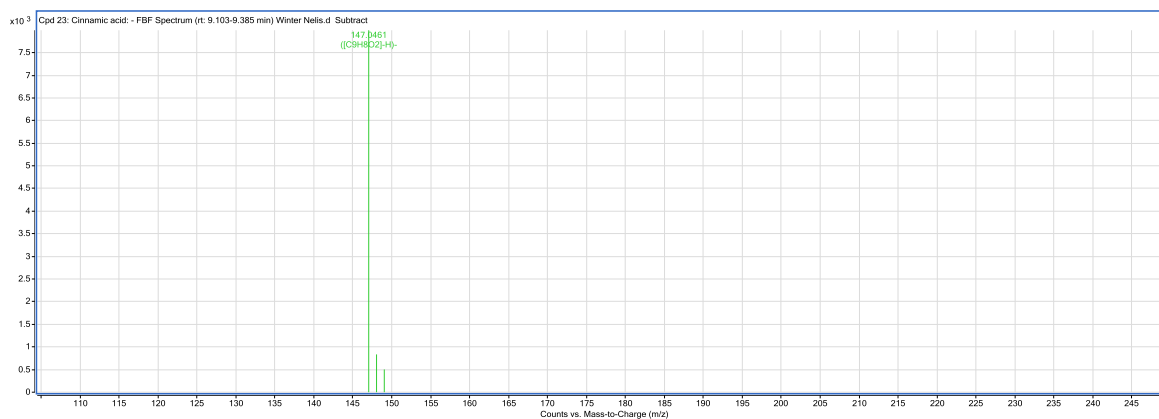

**Figure S2. Extracted ion chromatogram and their mass spectrum. (a)** A chromatograph of Vanillic acid 4-sulfate (Compound 1, Table 3), Retention time (RT = 5.122 min) in the negative mode of ionization (ESI/[M-H]<sup>-</sup>) identified and characterized in Beurre Bosc pear sample; **(b)** Mass spectra of Vanillic acid 4-sulfate showing an observed  $m/z$  246.9915 in Beurre Bosc; **(c)** A chromatograph of Gallic acid 4-*O*-glucoside (Compound 2, Table 3), Retention time (RT = 6.731 min) in the negative mode of ionization (ESI/[M-H]<sup>-</sup>) identified and characterized in Rico pear sample; **(d)** Mass spectra of Gallic acid 4-*O*-glucoside showing an observed  $m/z$  331.0675 in Rico; **(e)** A chromatograph of Caffeic acid (Compound 12, Table 3), Retention time (RT = 12.932 min) in the negative mode of ionization (ESI/[M-H]<sup>-</sup>) identified and characterized in Josephine de Malines pear sample; **(f)** Mass spectra of Caffeic acid showing an observed  $m/z$  179.0346 in Josephine de Malines; **(g)** A chromatograph of Isopimpinellin (Compound 62, Table 3), Retention time (RT = 4.478 min) in the positive mode of ionization (ESI/[M+H]<sup>+</sup>) identified and characterized in Packham's Triumph pear sample; **(h)** Mass spectra of Isopimpinellin showing an observed  $m/z$  247.0605 in Packham's Triumph; **(i)** A chromatograph of Cinnamic acid (Compound 10, Table 3), Retention time (RT = 9.219 min) in the negative mode of ionization (ESI/[M-H]<sup>-</sup>) identified and characterized in Winter Nelis pear sample; **(j)** Mass spectra of Cinnamic acid showing an observed  $m/z$  147.0461 in Winter Nelis.
